# Supplementary material for: Neural Network Underlying Recovery from Disowned Bodily States Induced by the Rubber Hand Illusion
Source: Hindawi journal article supplement (doi:10.1155/2016/8307175), 2016-01-01
Supplement: f1 [file 8307175.f1.pdf]

**Table 1. Bayesian model averaging (BMA) results**

|                                |                  | <b>1. RHI (<i>n</i> = 15)</b>                        | <b>2. R-TS (<i>n</i> = 16)</b> | <b>3. R-VS (<i>n</i> = 16)</b>                    | <b>Group comparison</b> |
|--------------------------------|------------------|------------------------------------------------------|--------------------------------|---------------------------------------------------|-------------------------|
| <b>Endogenous connectivity</b> | PMv<br>to<br>PMv | -0.041675<br>(0.202799)                              | 0.021790<br>(0.105770)         | -0.013673<br>(0.075633)                           | ns                      |
|                                | IPS to<br>PMv    | <b>0.177944<sup>a</sup></b><br><b>(0.179579)</b>     | 0.005708<br>(0.284790)         | <b>0.271541<sup>c</sup></b><br><b>(0.173853)</b>  | Group 2<br>< Group 3*   |
|                                | PMv<br>to IPS    | 0.088491<br>(0.155986216)                            | 0.018664<br>(0.201168)         | 0.082392<br>(0.130200)                            | ns                      |
|                                | IPS to<br>IPS    | <b>-0.246242<sup>b</sup></b><br><b>(0.184104894)</b> | -0.102473<br>(0.125546)        | <b>-0.141254<sup>b</sup></b><br><b>(0.133956)</b> | ns                      |
|                                | SII to<br>IPS    | -0.019684<br>(0.201039139)                           | 0.074669<br>(0.183667)         | 0.113084<br>(0.295023)                            | ns                      |
|                                | LOC<br>to IPS    | <b>0.199321<sup>b</sup></b><br><b>(0.17927604)</b>   | -0.061750<br>(0.175424)        | 0.091661<br>(0.276188)                            | Group 2<br>< Group 1*   |
|                                | IPS to<br>SII    | <b>0.275952<sup>c</sup></b><br><b>(0.147039265)</b>  | -0.011409<br>(0.227519)        | 0.073475<br>(0.249834)                            | Group 2<br>< Group 1*   |
|                                | SII to<br>SII    | <b>-0.265858<sup>c</sup></b><br><b>(0.178863548)</b> | -0.099381<br>(0.148633)        | -0.156575<br>(0.309578)                           | ns                      |
|                                | IPS to<br>LOC    | 0.225554<br>(0.273540155)                            | 0.002104<br>(0.405365)         | <b>0.220993<sup>a</sup></b><br><b>(0.266425)</b>  | ns                      |

|                                                     |                      |                                                   |                                                   |                                                   |                                           |
|-----------------------------------------------------|----------------------|---------------------------------------------------|---------------------------------------------------|---------------------------------------------------|-------------------------------------------|
|                                                     | LOC<br>to<br>LOC     | -0.262745<br>(0.39078941)                         | <b>-0.224111<sup>a</sup></b><br><b>(0.242831)</b> | -0.109061<br>(0.236735)                           | ns                                        |
| <b>Modulatory effect in the RHI, R-TS, and R-VS</b> | IPS to<br>PMv        | 0.104231<br>(0.144032)                            | <b>0.392094<sup>a</sup></b><br><b>(0.456576)</b>  | -0.030313<br>(0.264202)                           | Group 3<br>< Group 2**                    |
|                                                     | PMv<br>to IPS        | -0.084246<br>(0.523648)                           | -0.010238<br>(0.376813)                           | -0.222194<br>(0.808909)                           | ns                                        |
|                                                     | SII to<br>IPS        | -0.221262<br>(0.475994)                           | 0.053306<br>(0.841779)                            | 0.257131<br>(1.100166)                            | ns                                        |
|                                                     | LOC<br>to IPS        | 0.221825<br>(0.588721)                            | 0.168456<br>(0.512389)                            | -0.124894<br>(0.849538)                           | ns                                        |
|                                                     | IPS to<br>SII        | <b>-0.976345<sup>b</sup></b><br><b>(0.861761)</b> | <b>-1.578800<sup>c</sup></b><br><b>(1.117463)</b> | <b>-1.548563<sup>b</sup></b><br><b>(1.569129)</b> | ns                                        |
|                                                     | IPS to<br>LOC        | <b>-1.522450<sup>c</sup></b><br><b>(1.094337)</b> | <b>-1.916263<sup>a</sup></b><br><b>(2.061145)</b> | -1.757388<br>(2.545317)                           | ns                                        |
| <b>Driving input</b>                                | RHI to<br>SII        | <b>0.401545<sup>b</sup></b><br><b>(0.371363)</b>  | <b>0.719743<sup>c</sup></b><br><b>(0.514789)</b>  | <b>0.845209<sup>c</sup></b><br><b>(0.436752)</b>  | Group 2<br>< Group 3*                     |
|                                                     | RHI to<br>LOC        | <b>0.719957<sup>c</sup></b><br><b>(0.577537)</b>  | <b>0.923530<sup>b</sup></b><br><b>(0.841429)</b>  | <b>1.073355<sup>c</sup></b><br><b>(0.788928)</b>  |                                           |
|                                                     | Stimuli<br>to SII    | -                                                 | <b>0.109423<sup>c</sup></b><br><b>(0.079169)</b>  | <b>0.153042<sup>c</sup></b><br><b>(0.118605)</b>  |                                           |
|                                                     | Stimuli<br>to<br>LOC | -                                                 | 0.006113<br>(0.064922)                            | <b>0.118140<sup>b</sup></b><br><b>(0.111735)</b>  | Group 2<br>< Group 3 (p < 0.01, paired t) |

Mean (standard deviation; SD). a, b, c: one-sample t-test, Bonferroni-corrected,  $p < 0.05$ ,  $p < 0.01$ ,  $p < 0.001$ , respectively.

\*, \*\*, \*\*\*: group comparison, one-way ANOVA, Bonferroni-corrected,  $p < 0.05$ ,  $p < 0.01$ ,  $p < 0.001$ , respectively.

IPS: intraparietal sulcus; LOC: lateral occipitotemporal cortex; RHI: rubber hand illusion; PMv: ventral premotor cortex; R-TS: reinstantiation by tactile stimuli; R-VS: reinstantiation by visual stimuli; SII: secondary somatosensory cortex.
